# Supplementary material for: Methanol steam reforming for hydrogen production over NiTiO3 nanocatalyst with hierarchical porous structure
Source: Royal Society of Chemistry journal article supplement (doi:10.1039/d3ra02891g), 2023-01-01
Supplement: d3ra02891g1.pdf [file d3ra02891g1.pdf]

1 **Methanol steam reforming for hydrogen production over NiTi-O<sub>3</sub> nanocatalyst**  
2 **with hierarchical porous structure**

3 Qijie Jin,<sup>a,d†</sup> Xuelu Meng,<sup>a†</sup> Peng Wu,<sup>c</sup> Yunhe Li,<sup>a</sup> Mutao Xu,<sup>a,b</sup> Ranran Zhou,<sup>a</sup>  
4 Mengfei Yang,<sup>b</sup> Haitao Xu,<sup>a,d\*</sup>

5 *a. School of Environmental Science and Engineering, Nanjing Tech University,*  
6 *Nanjing 210009, PR China.*

7 *b. College of Materials Science and Engineering, Nanjing Tech University, Nanjing*  
8 *210009, PR China*

9 *c. Key Laboratory of Energy Thermal Conversion and Control of Ministry of*  
10 *Education, School of Energy and Environment, Southeast University, Nanjing,*  
11 *210096, PR China*

12 *d. Nanjing Gekof Institute of Environmental Protection Technology & Equipment*  
13 *Co., Nanjing 210031, PR China*

14 †These authors contributed equally to this work.

15 \*Corresponding author: Prof. Haitao Xu

16 **E-mails:** htxu@njtech.edu.cn (Haitao Xu)

17

## 18 **Materials and chemicals**

19 The polyethylene oxide-polypropylene oxide-polyethylene oxide triblock  
20 copolymer (P123, average Mn ~5,800), citric acid monohydrate (AR), nickel chloride  
21 hexahydrate (AR), anhydrous ethanol ( $\geq 99.7\%$ ), methanol (GR,  $\geq 99.7\%$ ) and butyl  
22 titanate (AR) were purchased from *Sinopharm Chemical Reagent Co., Ltd* (Shanghai,  
23 China). Deionized water (AR) was purchased from *Nanjing Wanqing Chemical Galss*  
24 *Instrument Co., Ltd* (Jiangsu, China). All chemicals were of analytical grade and used  
25 without further processing.

## 27 **Catalysis measurement and characterization**

28 For the selectivity, the gases were tested by the Shimadzu Gas Chromatography  
29 (GC-2014), and a Thermal Conductivity Detector (TCD as abbreviation) was used  
30 with a TDX-01 column. For the conversion, the liquid components were analyzed by  
31 gas chromatography (GC-7820) equipped with FID detector, where the SE-30  
32 chromatographic column was responsive to methanol. The content of each reactant in  
33 the liquid product can be calculated according to the calibration curve formula.

34 X-ray diffraction (XRD) patterns were obtained on an X-ray diffractometer  
35 (Smartlab TM 3Kw, Rigaku, Japan). The  $2\theta$  scans covered the range  $5-85^\circ$ , and the  
36 accelerating voltage and applying current were 40 kV and 40 mA, respectively. The  
37 microstructural natures and element mapping of the catalysts have been investigated  
38 using a scanning electron microscope (JEOL, JEM-2010UHR). The X-ray  
39 photoelectron spectroscopy (XPS) patterns were acquired by the PHI 5600  
40 spectrometer with a hemispherical energy analyzer (Mg- $K_\alpha$  radiation, 1253.6 eV at  
41 100 Watts), and the vacuum degree was maintained at  $10^{-7}$  Pa. The samples were  
42 dried at  $80^\circ\text{C}$  for 24 h to remove moisture and then were tested without surface  
43 treatment. Curve fitting was performed by utilizing XPSPEAK 4.1 with a Shirley-type  
44 background. The specific surface area and average pore diameter (BET method) of  
45 the samples were measured by  $\text{N}_2$  adsorption/desorption isotherms at  $-163^\circ\text{C}$  using a  
46 surface-area analyzer (Micromeritics, 2020M V3.00H). All of the samples were  
47 degassed at  $350^\circ\text{C}$  under vacuum for 3 h prior to the adsorption experiments. The  
48 temperature programmed desorption of ammonia ( $\text{NH}_3$ -TPD) was conducted on the  
49 CHEMBET-3000 (Quantachrome) to obtain the surface acid properties. All the  
50 catalysts were preheated at  $450^\circ\text{C}$  under a helium stream for 1 h, and then cooled to  
51  $50^\circ\text{C}$  for the ammonia adsorption. Afterwards, ammonia was desorbed from  $50^\circ\text{C}$  to  
52  $650^\circ\text{C}$  at a heating rate of  $10^\circ\text{C}\cdot\text{min}^{-1}$ . The temperature programmed desorption of  
53 carbon dioxide ( $\text{CO}_2$ -TPD) was conducted on the CHEMBET-3000 (Quantachrome)  
54 to obtain the surface alkaline properties. All the catalysts were preheated at  $400^\circ\text{C}$   
55 under a helium stream for 1 h, and then cooled to  $50^\circ\text{C}$  for the carbon dioxide

56 adsorption. Afterwards, carbon dioxide was desorbed from 50 °C to 650 °C at a  
57 heating rate of 10 °C·min<sup>-1</sup>. The Semiautomatic Micromeritics TPD/TPR 2900  
58 instrument was used for the temperature programmed reduction of hydrogen (H<sub>2</sub>-  
59 TPR). All the catalyst carriers were preheated to 400 °C under an argon stream for 1 h,  
60 and cooled to 50 °C. Then 5% H<sub>2</sub>/Ar flow was switched, and the temperature  
61 increased from 50 °C to 800 °C at a 10 °C·min<sup>-1</sup> heating rate. The data were collected  
62 throughout the whole temperature range. *In situ* Diffuse Reflectance Infrared Fourier  
63 Transform Spectra (*in situ* DRIFTS) were collected by a Nicolet IS50 spectrometer.  
64 All the catalysts were preheated at 400 °C under a N<sub>2</sub> stream for 2 h, and then cooled  
65 to the desired temperature. The methanol, water vapor and nitrogen were pumped into  
66 the system for 10 min when the temperature was cooled to 400 °C. Then the  
67 temperature increased to 450 °C and 500 °C, and kept for 10 min.

68

69 Fig.S1

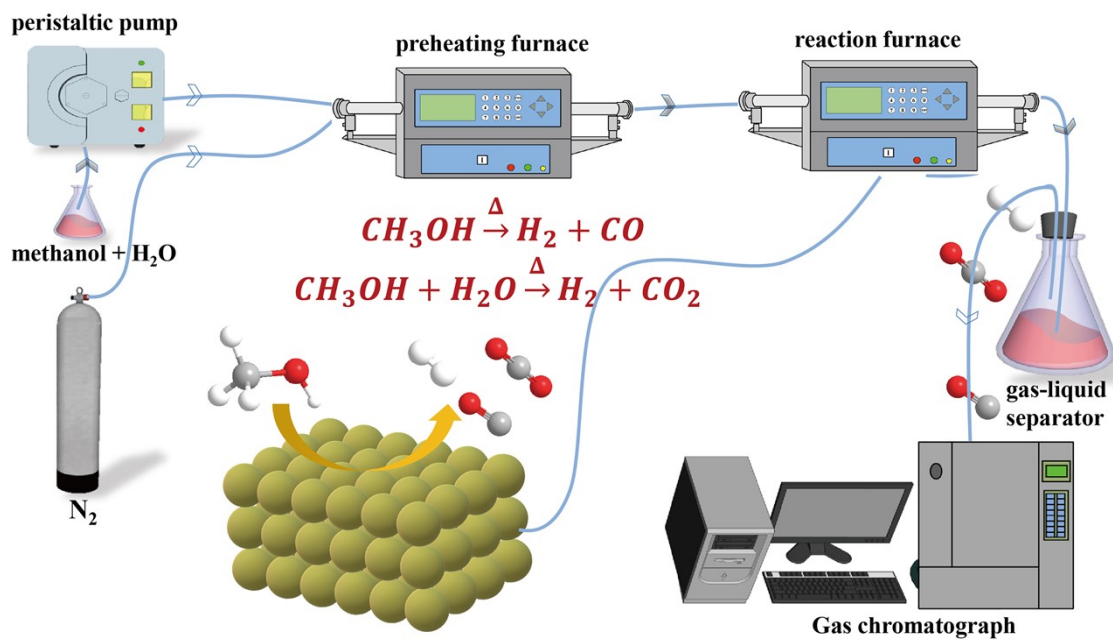

70

71

Fig.S1 The schematic for the catalytic reaction system.

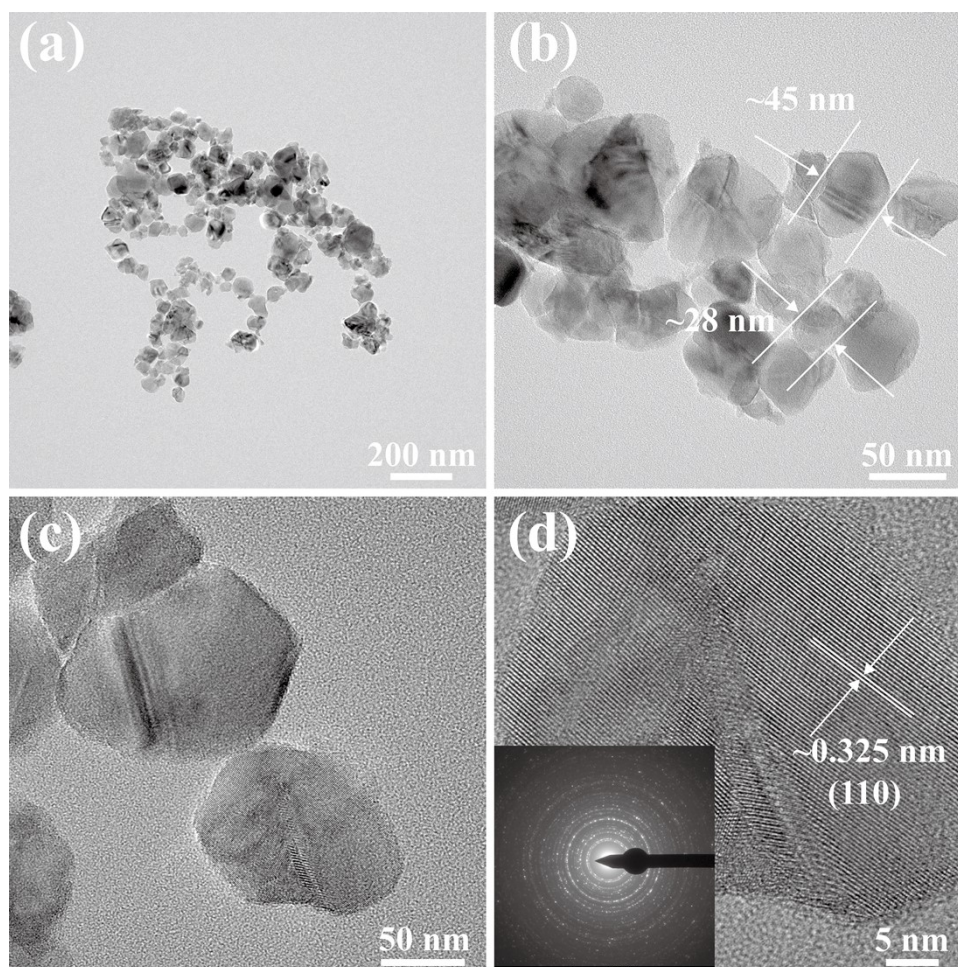

74

75

Fig.S2 HR-TEM micrograph of TiO<sub>2</sub> catalyst.

77 **Fig.S3**

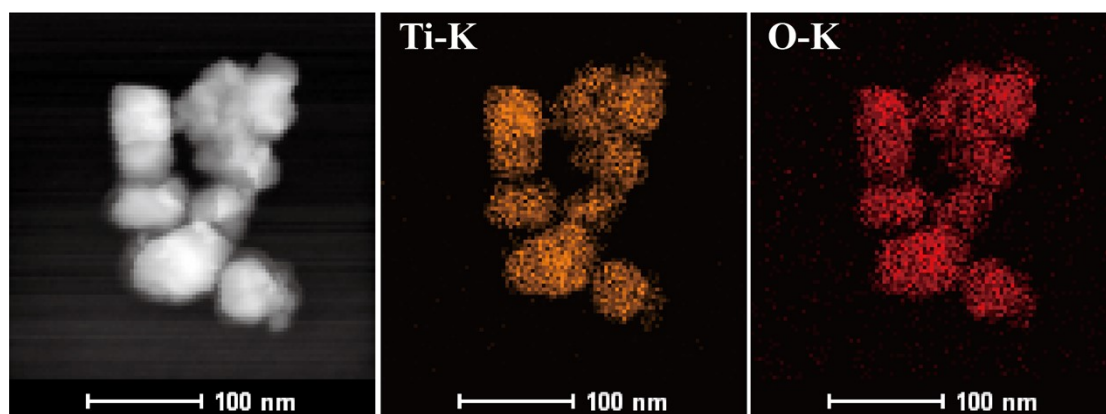

78

79

80

**Fig.S3** The elemental mapping of  $\text{TiO}_2$ : O and Ti.

81 **Fig.S4**

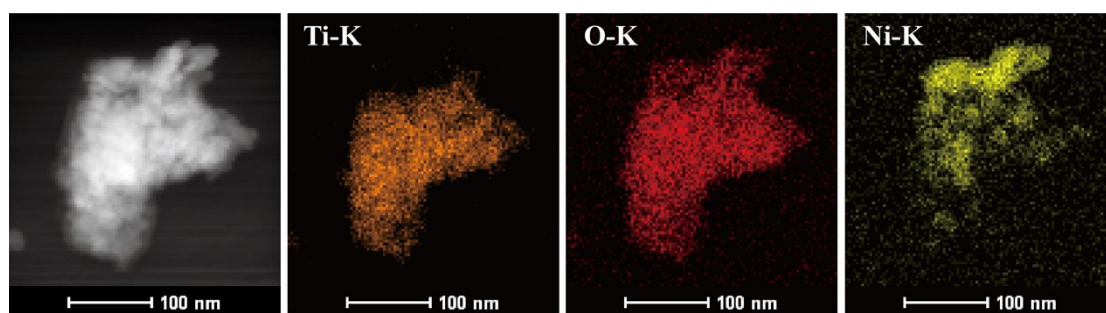

82

83

**Fig.S4** The elemental mapping of 10%Ni-Ti-O<sub>x</sub> catalyst: O, Ni and Ti.

84



85 Fig.S5

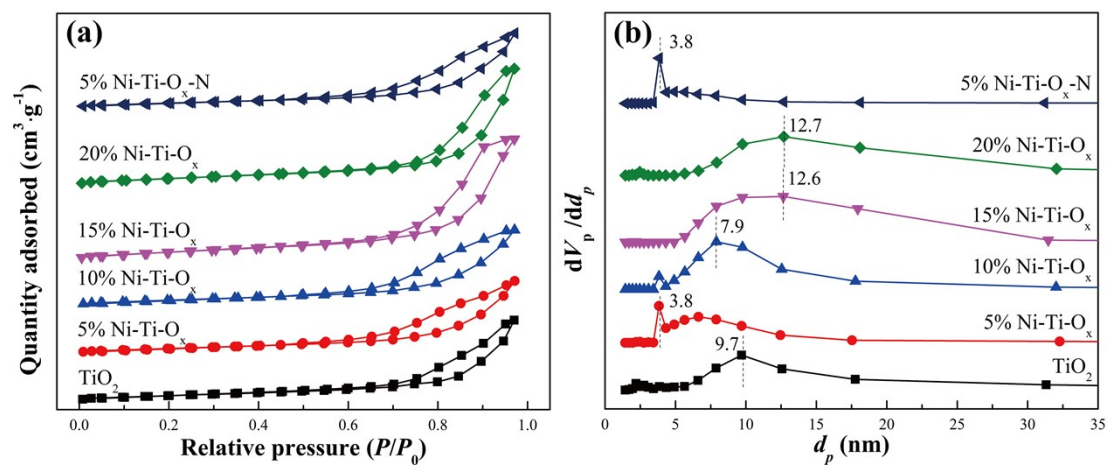

86

87 Fig.S5 (a) Nitrogen adsorption-desorption curve, (b) pore size distribution of different

88

catalysts.

89

90 **Fig.S6**

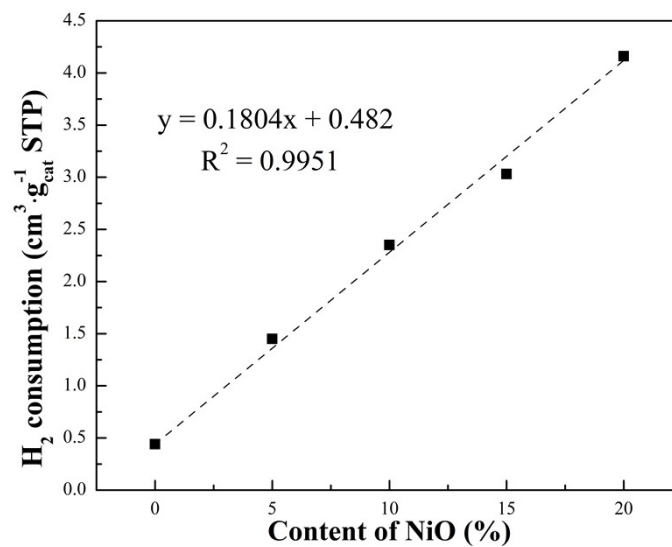

91

92 **Fig.S6** The relationship between the NiO content and H<sub>2</sub> consumption of different

93

catalysts.

94 **Fig.S7**

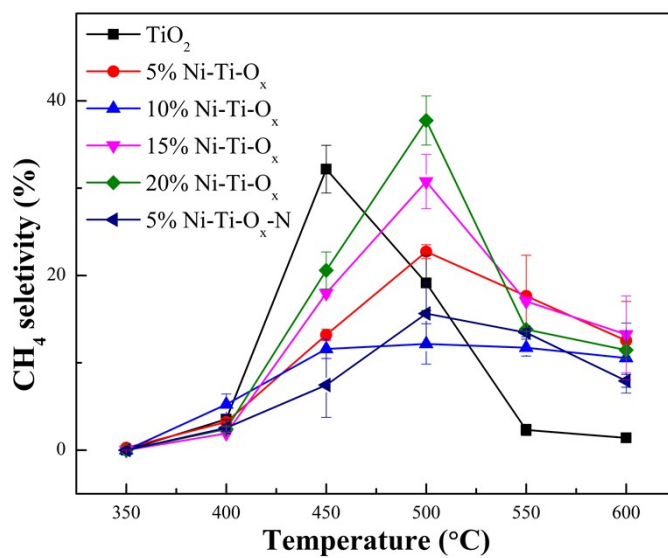

95

96

**Fig.S7** CH<sub>4</sub> selectivity of different catalysts.

97

98 **Fig.S8**

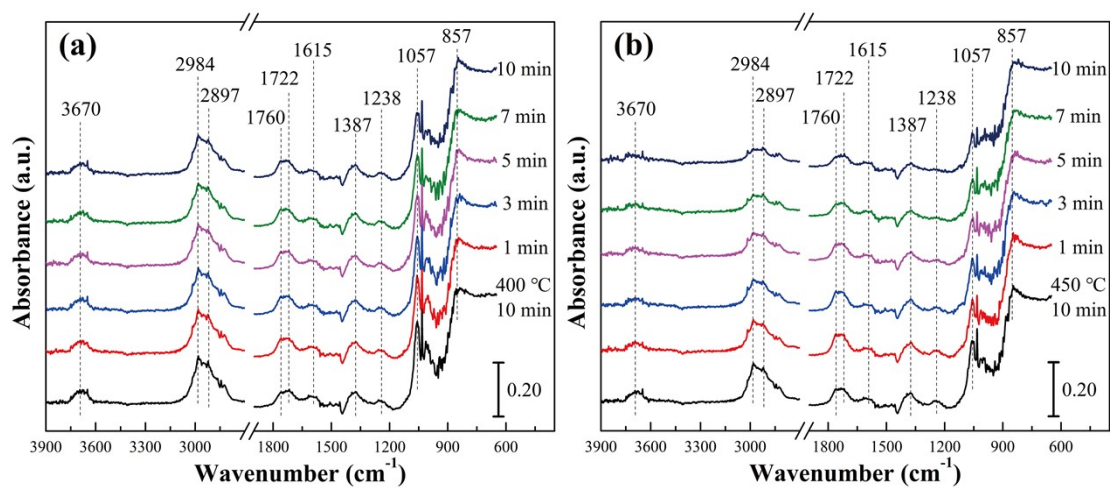

99

100 **Fig.S8** *In situ* DRIFT spectra of TiO<sub>2</sub> catalyst at different temperatures: (a) methanol

101 reacted with H<sub>2</sub>O at 450 °C and (d) methanol reacted with H<sub>2</sub>O at 500 °C.

102 **Fig.S9**

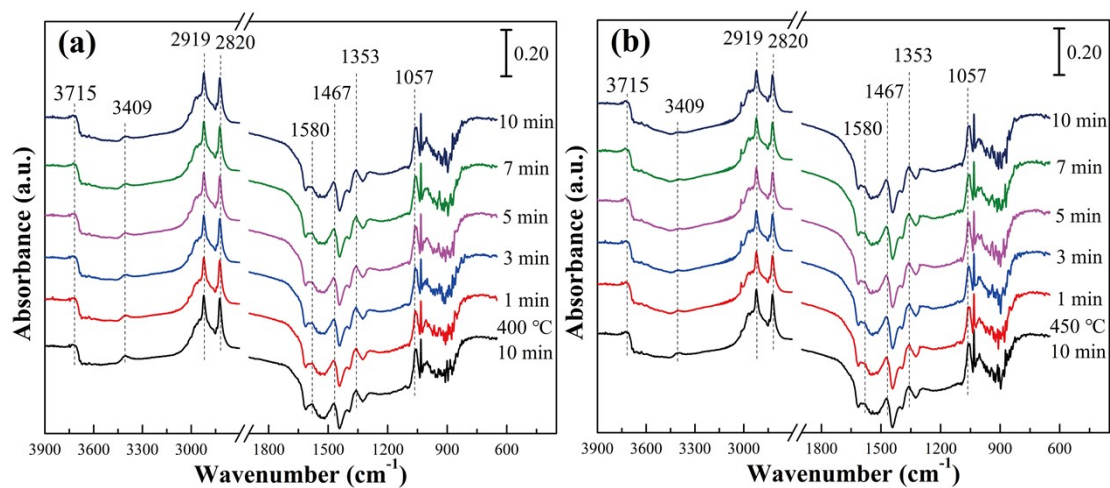

103

104 **Fig.S9** *In situ* DRIFT spectra of 10%Ni-Ti-O<sub>x</sub> catalyst at different temperatures: (a)

105 methanol reacted with H<sub>2</sub>O at 450 °C and (d) methanol reacted with H<sub>2</sub>O at 500 °C.

106 **Fig.S10**

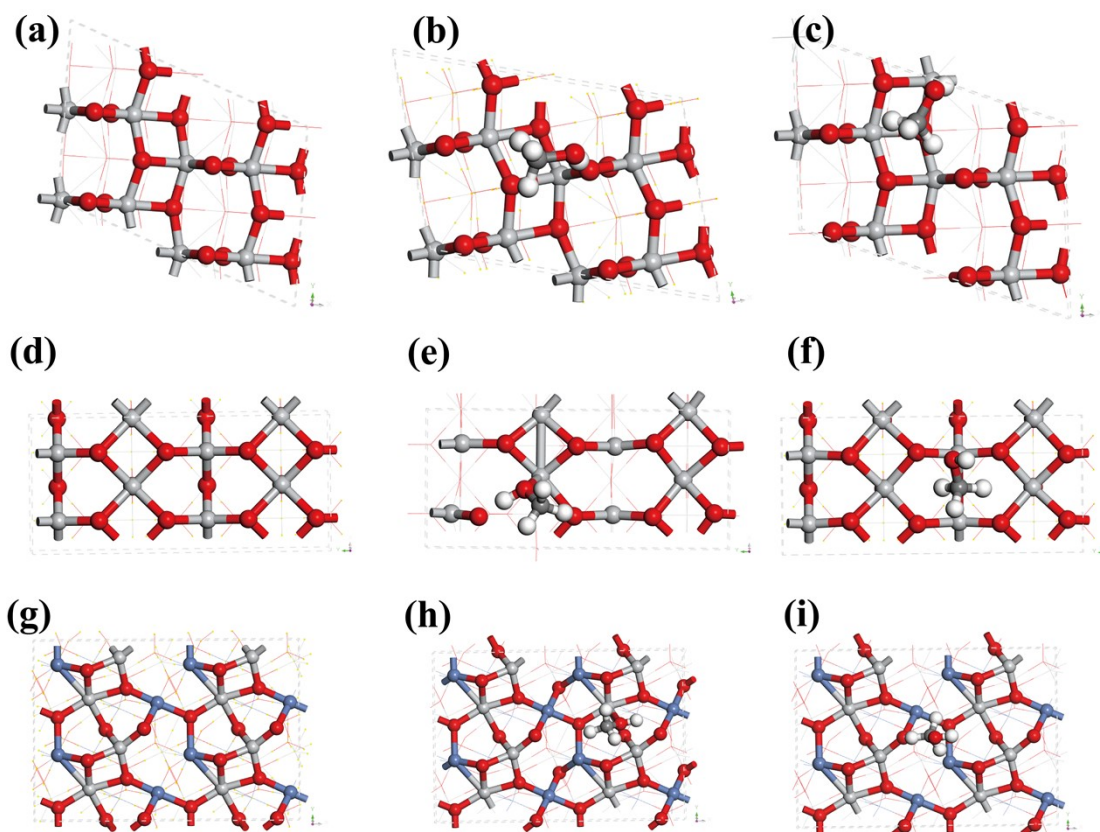

107

108 **Fig.S10** (a) the (101) facet of anatase  $\text{TiO}_2$ , (b) the first  $\text{CH}_3\text{OH}$  adsorption model

109 (site 1) on the (101) facet of anatase  $\text{TiO}_2$ , (c) the second  $\text{CH}_3\text{OH}$  adsorption model

110 (site 2) on the (101) facet of anatase  $\text{TiO}_2$ ; (d) the (110) facet of rutile  $\text{TiO}_2$ , (e) the

111 first  $\text{CH}_3\text{OH}$  adsorption model (site 1) on the (110) facet of rutile  $\text{TiO}_2$ , (f) the second

112  $\text{CH}_3\text{OH}$  adsorption model (site 2) on the (110) facet of rutile  $\text{TiO}_2$ ; (g) the (104) facet

113 of  $\text{NiTiO}_3$ , (h) the first  $\text{CH}_3\text{OH}$  adsorption model (site 1) on the (104) facet of  $\text{NiTiO}_3$ ,

114 (i) the second  $\text{CH}_3\text{OH}$  adsorption model (site 2) on the (104) facet of  $\text{NiTiO}_3$ .

115
